# Supplementary material for: Microencapsulation of Capsaicin in Chitosan Microcapsules: Characterization, Release Behavior, and Pesticidal Properties against Tribolium castaneum (Herbst)
Source: MDPI journal article supplement (doi:10.3390/insects14010027), 2022-12-27
Supplement: s1 [file s1]

## Supporting information

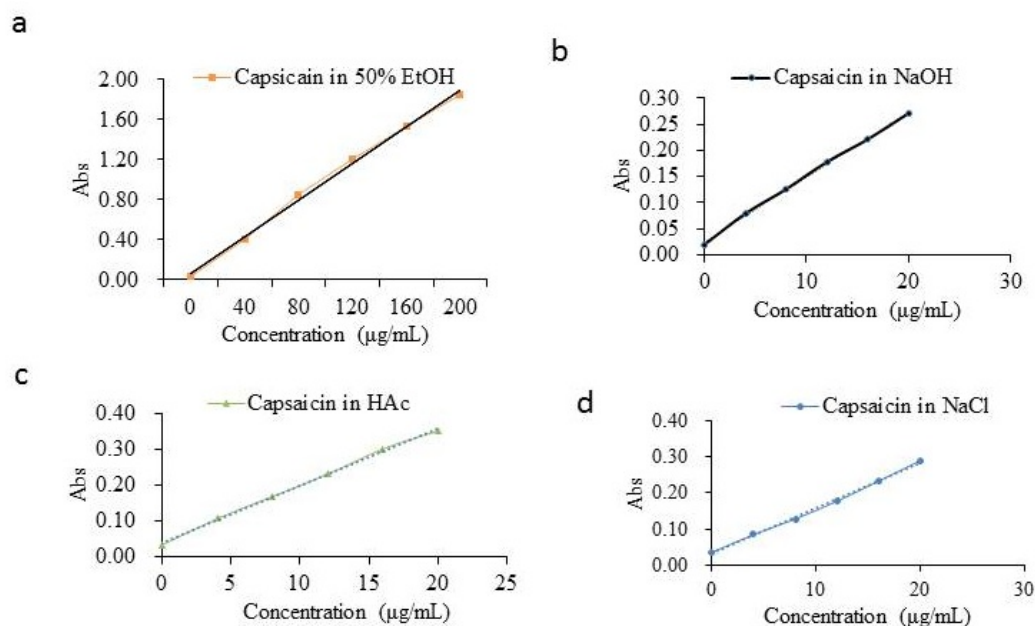

Fig. S1. The release of pure capsaicin in various solutions at different pH values

(a) 50% ethanol solution,  $y = 0.366x - 0.3021$ ,  $R^2 = 0.9963$ ; (b) NaOH solution ( pH 9.94),  $y = 0.0124x + 0.0254$ ,  $R^2 = 0.9983$ ; (c) acetate solution (pH 3.03 )  $y = 0.016x + 0.0379$ ,  $R^2 = 0.9979$ ; (d) NaCl solution ( pH 9.94),  $y = 0.0126x + 0.032$ ,  $R^2 = 0.9973$ .

Table 1S Mortality of *T. castaneum* adults exposed to different concentrations of pure CAP and CCMs

| Pesticide | Con(mg/kg flour) | 7 days Mortality (%) $\pm$ SD | Slope function(S) | LC <sub>50</sub> $\pm$ SE (mg/kg) | LCL-UCL (mg/kg) | $\chi^2$ |
|-----------|------------------|-------------------------------|-------------------|-----------------------------------|-----------------|----------|
| CAP       | Control          | 6.67 $\pm$ 0.58a              | 1.196 $\pm$ 0.335 | 31.37                             | 22.92-48.54     | 5.292*   |
|           | 10               | 28.57 $\pm$ 1.53b             |                   |                                   |                 |          |
|           | 20               | 37.50 $\pm$ 0.58bc            |                   |                                   |                 |          |
|           | 30               | 53.57 $\pm$ 1.15d             |                   |                                   |                 |          |
|           | 40               | 51.79 $\pm$ 2.00de            |                   |                                   |                 |          |
|           | 50               | 60.71 $\pm$ 1.53e             |                   |                                   |                 |          |
| CCMs      | Control          | 6.67 $\pm$ 0.58a              | 1.389 $\pm$ 0.34  | 29.75                             | 22.59-41.19     | 6.237*   |
|           | 10               | 28.57 $\pm$ 1.15b             |                   |                                   |                 |          |
|           | 20               | 37.50 $\pm$ 1.53bc            |                   |                                   |                 |          |
|           | 30               | 48.21 $\pm$ 1.53bcd           |                   |                                   |                 |          |
|           | 40               | 53.57 $\pm$ 2.08cd            |                   |                                   |                 |          |
|           | 50               | 67.86 $\pm$ 1.00e             |                   |                                   |                 |          |

Means followed by different letters are significantly different ( $P < 0.05$ ; one-way ANOVA and Tukey's test). SD, standard deviation; SE, standard error; Con, concentration. LCL, lower confidence limits, UCL, upper confidence limits,  $\chi^2$ , Chi-square test.

Table 2S Mortality of *T. castaneum* adults exposed to 30mg/Kg of pure CAP and CCMs for different time

| Pesticide | Exposure time(d) | Mortality (%)± SD | Slope function(S) | KT <sub>50</sub> ±SE (d) | LCL-UCL (d) | χ <sup>2</sup> |
|-----------|------------------|-------------------|-------------------|--------------------------|-------------|----------------|
| CAP       | 0                | 0.00              | 2.404±0.312       | 5.86                     | 5.10-7.08   | 13.26*         |
|           | 1                | 5.00±1.00a        |                   |                          |             |                |
|           | 2                | 10.00±1.73a       |                   |                          |             |                |
|           | 3                | 20.34±0.58ab      |                   |                          |             |                |
|           | 4                | 35.59±1.53bc      |                   |                          |             |                |
|           | 5                | 43.10±2.00c       |                   |                          |             |                |
|           | 6                | 49.12±2.52c       |                   |                          |             |                |
|           | 7                | 53.57±1.15c       |                   |                          |             |                |
| CCMs      | 0                | 0.00              | 1.442±0.269       | 8.994                    | 6.70-15.74  | 7.372*         |
|           | 1                | 11.67±0.58a       |                   |                          |             |                |
|           | 2                | 11.67±0.58b       |                   |                          |             |                |
|           | 3                | 20.34±0.58bc      |                   |                          |             |                |
|           | 4                | 23.73±1.00bc      |                   |                          |             |                |
|           | 5                | 29.31±1.53cd      |                   |                          |             |                |
|           | 6                | 38.60±1.53de      |                   |                          |             |                |
|           | 7                | 48.21±1.53e       |                   |                          |             |                |

Means followed by different letters are significantly different ( $P < 0.05$ ; one-way ANOVA and Tukey's test). SD, standard deviation; SE, standard error; Con, concentration. LCL, lower confidence limits, UCL, upper confidence limits,  $\chi^2$ , Chi-square test.
